# Supplementary material for: Highly efficient nitrate ester explosive vapor probe based on multiple triphenylaminopyrenyl-substituted POSS
Source: Royal Society of Chemistry journal article supplement (doi:10.1039/c4ta05704j), 2014-11-26
Supplement: c4ta05704j1.pdf [file c4ta05704j1.pdf]

## Supporting Information

### Highly efficient nitrate ester explosives vapor probe based on multiple triphenylaminopyrenyl-substituted POSS

Yixun Gao<sup>a,b</sup>, Wei Xu<sup>a,c</sup>, Lei Chen<sup>a,b</sup>, Defeng Zhu<sup>a</sup>, Yanyan Fu<sup>a</sup>, Qingguo He<sup>a</sup>, Huimin Cao<sup>a</sup> and Jiangong Cheng<sup>a</sup>

<sup>a</sup>State Key Lab of Transducer Technology, Shanghai Institute of Microsystem and Information Technology, Chinese Academy of Sciences, Changning Road 865, Shanghai 200050, China.

E-mail: [hqg@mail.sim.ac.cn](mailto:hqg@mail.sim.ac.cn); [jgcheng@mail.sim.ac.cn](mailto:jgcheng@mail.sim.ac.cn).

<sup>b</sup>University of the Chinese Academy of Sciences, Yuquan Road 19, Beijing, 100039, China

<sup>c</sup>Shanghaitech University, No.8 Building, 319 Yueyang Road, Shanghai 200031, China

#### Section 1 TGA Profile

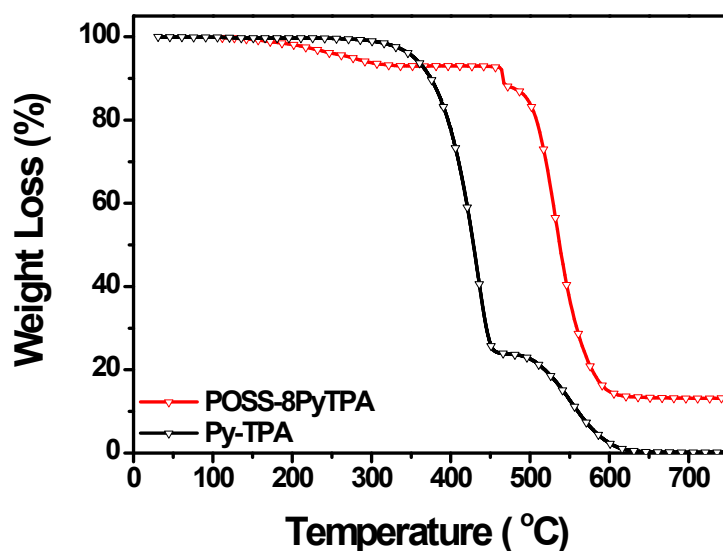

Fig.S1 TGA curve of POSS-8PyTPA and Py-TPA under oxygen.

## Section 2 MALDI-TOF Profile

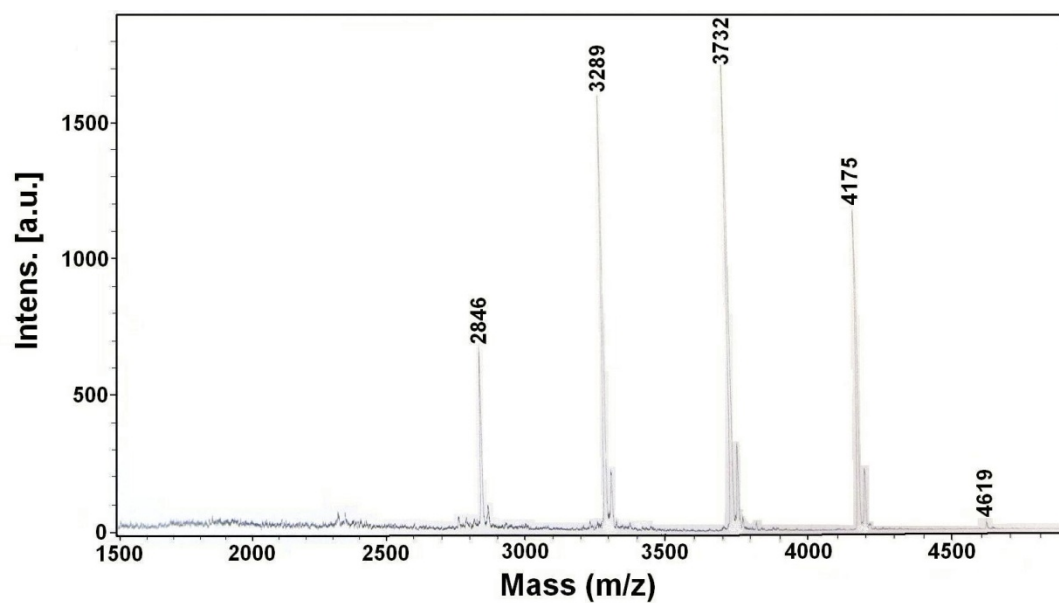

Fig.S2 MALDI-TOF spectra of POSS-8PyTPA.

## Section 3 CV Profile

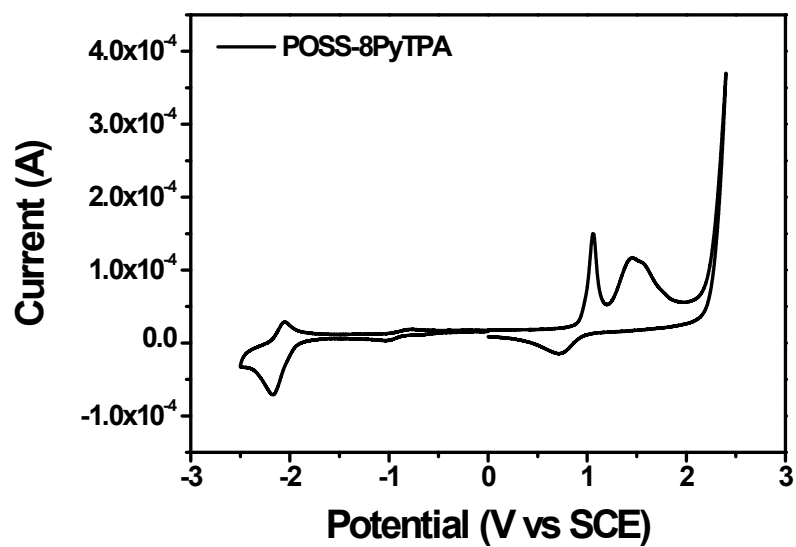

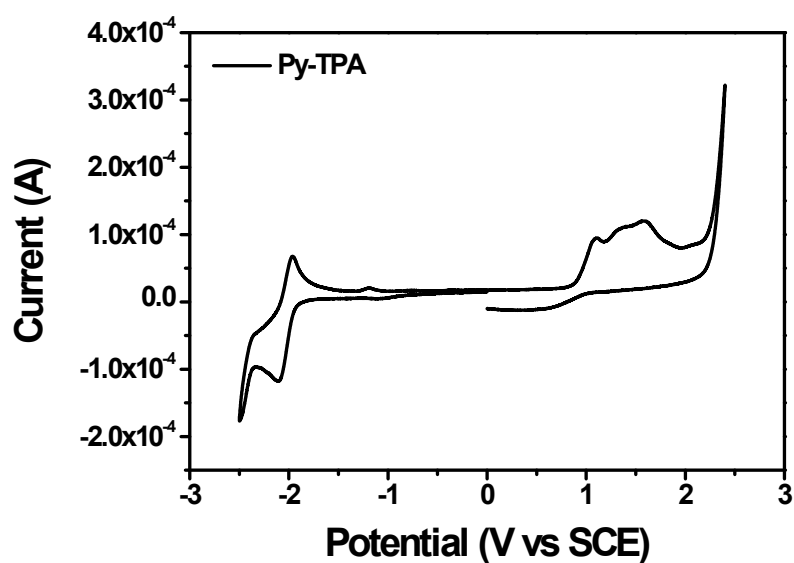

Fig.S3 Cyclic voltammetric curves of POSS-8PyTPA and Py-TPA.

## Section 4 Structural Models Calculation Methods

Energy minimization of POSS-8PyTPA was conducted using the Materials Studio version 7.0 program, by means of Geometry Optimization and Dynamics tasks in the Forcite module (Accelrys Software, Inc.). The calculation used a COMPASS II forcefield with atom-based summation for both the electrostatic and van der Waals parameters. Dynamics used a Canonical Ensemble (NVT) ensemble at 298K with Nose method.

## Section 5 Supposition of the Configuration

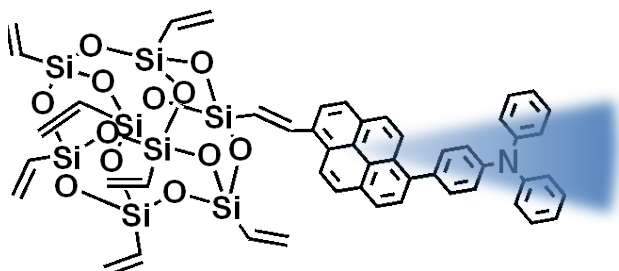

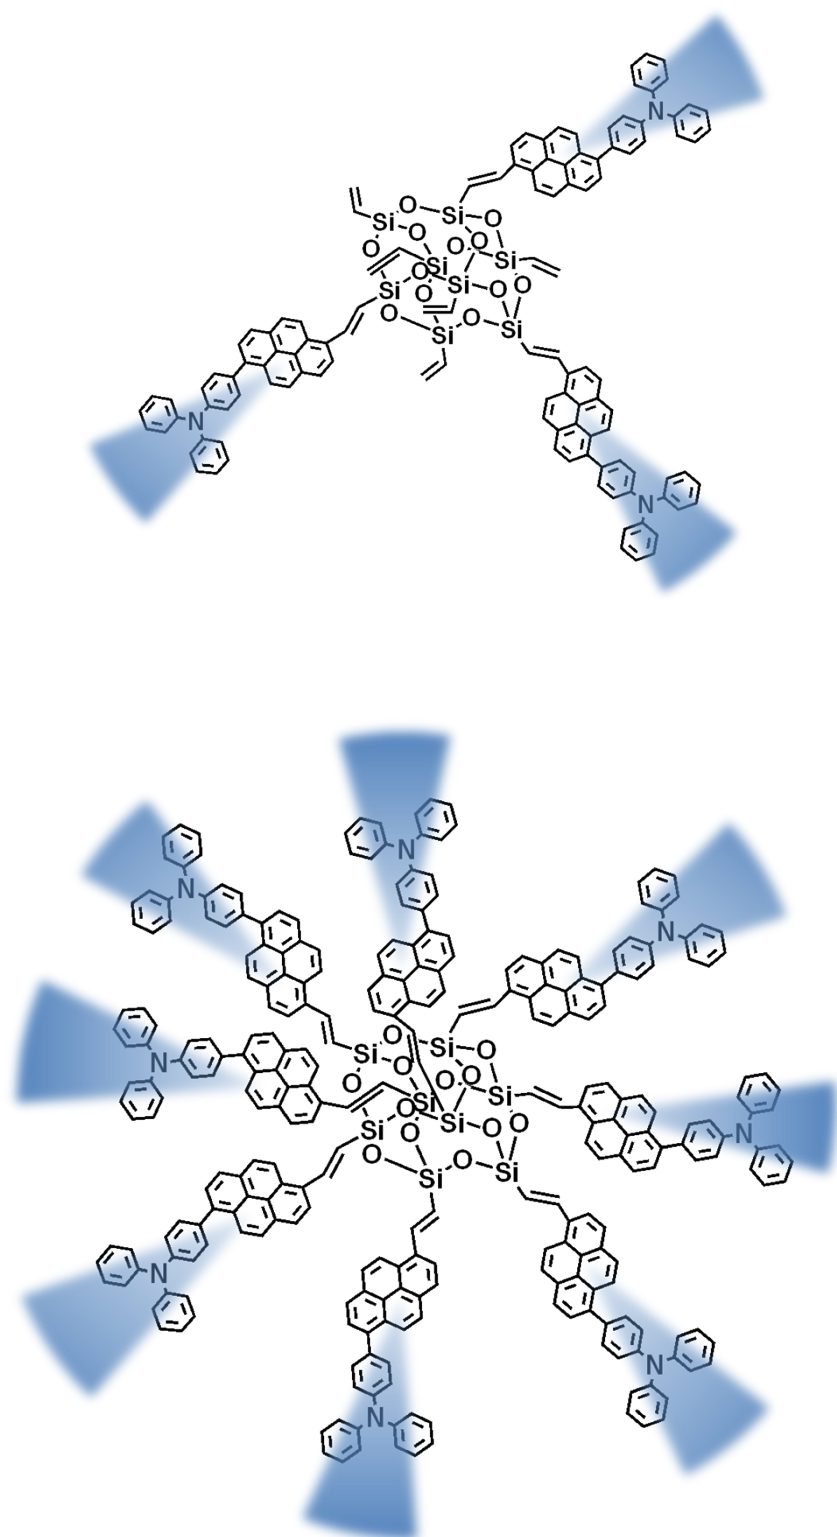

**Fig.S5** The configuration of **P1PT**, **P3PT** and **P8PT**

We suppose the molecular structure of **P1PT**, **P3PT** and **P8PT** as shown in Fig.S5. The

majority of intermolecular interaction comes from Py-TPA units on POSS, while different number of Py-TPA units on POSS (P1PT, P3PT and P8PT) may result in different aggregation behavior. P1PT and P3PT is rather asymmetry in molecular structure, while P8PT are symmetry, therefore P8PT tend to form more smooth aggregation film while P1PT and P3PT prefer random aggregation.
